# Supplementary material for: Enhanced photomultiplication in filter-free organic photodetectors for red and NIR light sensing using minimal nonfullerene blends
Source: Royal Society of Chemistry journal article supplement (doi:10.1039/d4tc02280g), 2024-01-01
Supplement: d4tc02280g1.pdf [file d4tc02280g1.pdf]

# 1 **Enhanced Photomultiplication in Filter-Free Organic Photodetectors for** 2 **Red and NIR Light Sensing Using Minimal Nonfullerene Blends**

3

4 *Linlin Shi*<sup>1,4\*</sup>, *Yaojiang Li*<sup>1</sup>, *Jia Jiao*<sup>1</sup>, *Ye Zhang*<sup>1</sup>, *Guohui Li*<sup>1,2\*</sup>, *Ting Ji*<sup>1</sup>, *Furong Zhu*<sup>3</sup>,  
5 *Haifeng Lu*<sup>4</sup>, and *Yanxia Cui*<sup>1,2\*</sup>

6

7 <sup>1</sup> College of Electronic Information and Optical Engineering, Key Lab of Interface Science and  
8 Engineering in Advanced Materials of Ministry of Education, Key Lab of Advanced  
9 Transducers and Intelligent Control System of Ministry of Education, Taiyuan University of  
10 Technology, Taiyuan 030024, China

11 <sup>2</sup>Shanxi-Zheda Institute of Advanced Materials and Chemical Engineering, Taiyuan 030032,  
12 China

13 <sup>3</sup> Department of Physics, Research Centre of Excellence for Organic Electronics, Institute of  
14 Advanced Materials, Hong Kong Baptist University, Kowloon Tong, Hong Kong, SAR,  
15 China

16 <sup>4</sup> Yungu (Gu'an) Technology Co., Ltd., Gu'an/Langfang, Hebei 065500, China

17 \*Correspondence author: shilinlinsll@163.com, liguohui@tyut.edu.cn, yanxiacui@tyut.edu.cn  
18

19

## 20 **Calculations**

21 The external quantum efficiency and responsivity values of OPDs were derived according to  
22 the number of collected charges and the number of incident photons by Equations (1-3):<sup>[1]</sup>

23 
$$EQE = \frac{J_{ph}/e}{P_{in}/h\nu}, \quad (1)$$

24 
$$EQE = \frac{\chi\tau\mu V}{L^2} \quad (2)$$

25 
$$R = \frac{J_{ph}}{P_{in}} = \frac{EQE \cdot e}{h\nu} \quad (3)$$

26

27  $J_{ph}$  is the photogenerated current density (the measured current density under light ( $J_L$ ) minus  
28 the dark current density ( $J_d$ )),  $h$  is the Planck constant, and  $\nu$  is the frequency of incident light,  
29  $h\nu$  is photon energy, and  $P_{in}$  is the illumination power density.  $\chi$  is the ratio of captured carriers  
30 to the total exciton dissociation rate,  $\tau$  is the lifetime of the captured carriers,  $V$  is the value of

1 the applied bias voltage,  $\mu$  is the mobility of the uncaptured carriers, and  $L$  is the device  
 2 thickness.

3

4  $D^*$  of the device calculated from  $i_n$  is according to formula (3-4): [2]

$$5 \quad D^* = \frac{R\sqrt{AB}}{i_n}, \quad (4)$$

6  $A$  is the active area of the PM-OPDs,  $B$  is the bandwidth.

7 Dynamic range (DR) is referred as the predictable photoresponse generated from the  
 8 highest and lowest detectable illumination power densities, when the slope ( $\beta$ ) of the  
 9 photocurrent density versus light intensity curve is less than 1, exhibiting the sublinear  
 10 response. It often exists in the photodetectors with gain or photomultiplication. The  
 11 photodiodes often show a linear dynamic range (LDR) with  $\beta=1$ . Thus the DR and LDR of the  
 12 devices are calculated by the following equations: [3-5]

$$13 \quad DR = 20 \log \frac{P_{\text{high}}}{P_{\text{low}}} \neq 20 \log \frac{I_{\text{high}}}{I_{\text{low}}} \quad (5)$$

$$14 \quad LDR = 20 \log \frac{P_{\text{high}}}{P_{\text{low}}} = 20 \log \frac{I_{\text{high}}}{I_{\text{low}}} \quad (6)$$

15 where  $P_{\text{high}}$  and  $P_{\text{low}}$  are the highest and lowest detectable illumination power densities of the  
 16 photocurrent density versus light intensity curve.  $I_{\text{high}}$  and  $I_{\text{low}}$  are the highest and lowest  
 17 photocurrent density of the photocurrent density versus light intensity curve.

18

### Supplementary Figures

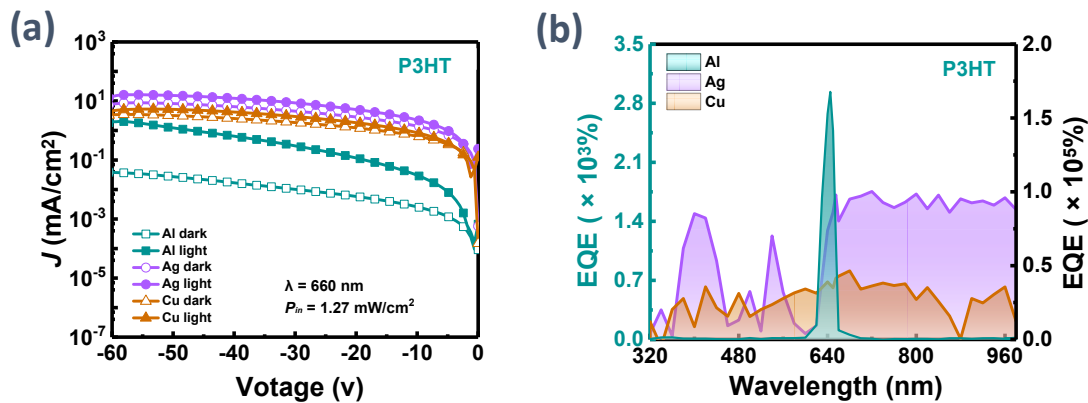

19

20 Figure S1 (a)  $J$ - $V$  characteristics measured for the PM-OPDs with a 2.8  $\mu\text{m}$  thick P3HT active  
 21 layer in dark and under illumination of the 660 nm LED having a power density of 1.27

1 mW/cm<sup>2</sup>. (b) EQE spectra measured for the P3HT based PM-OPDs with different cathode contacts, operated under the bias of -60 V.

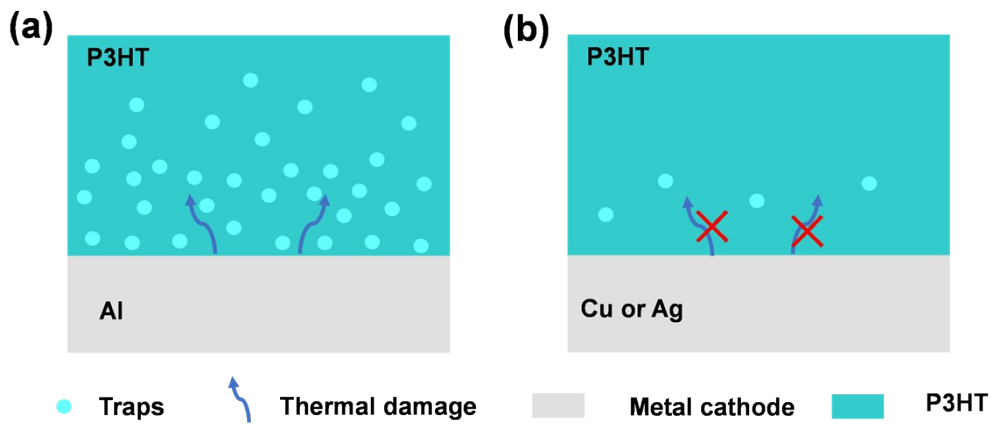

3  
4 Figure S2 Schematic diagrams illustrating the formation of traps at the (a) P3HT/Al, (b)  
5 P3HT/Cu (Ag) interfaces.

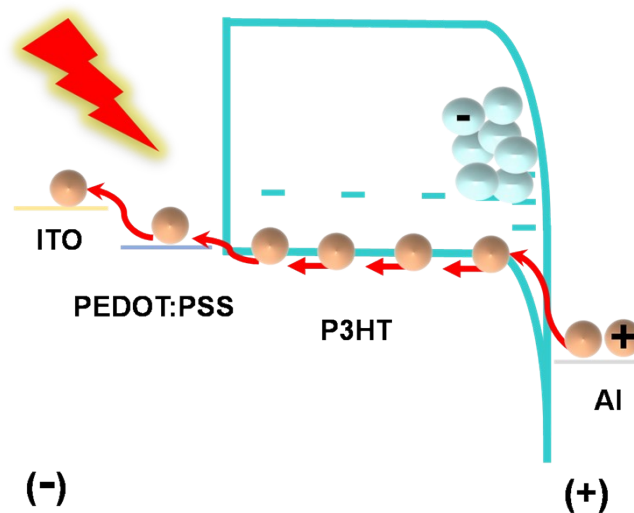

6  
7 Figure S3 Schematic diagram illustrating the tunneling hole injection at the P3HT/Al interface  
8 in a P3HT-based PM-OPD, operated under a reverse bias, under illumination of a 660 nm LED.

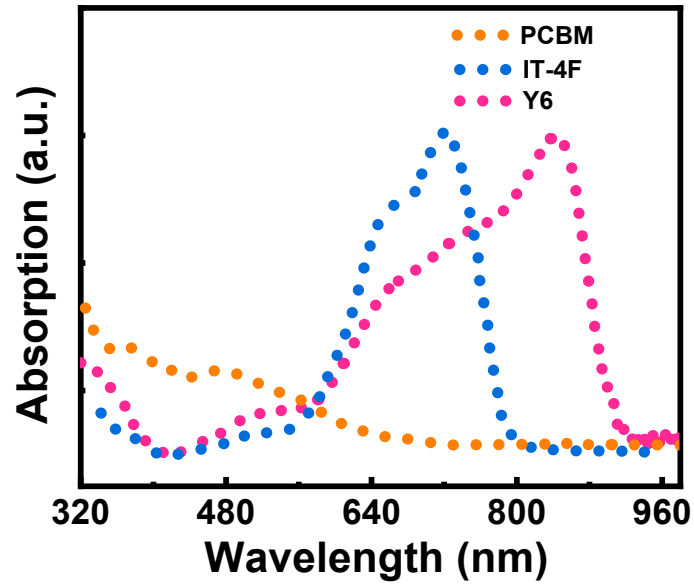

1

2 Figure S4 Absorption spectra of the acceptors used in preparation of different PM-OPDs in this  
 3 work.

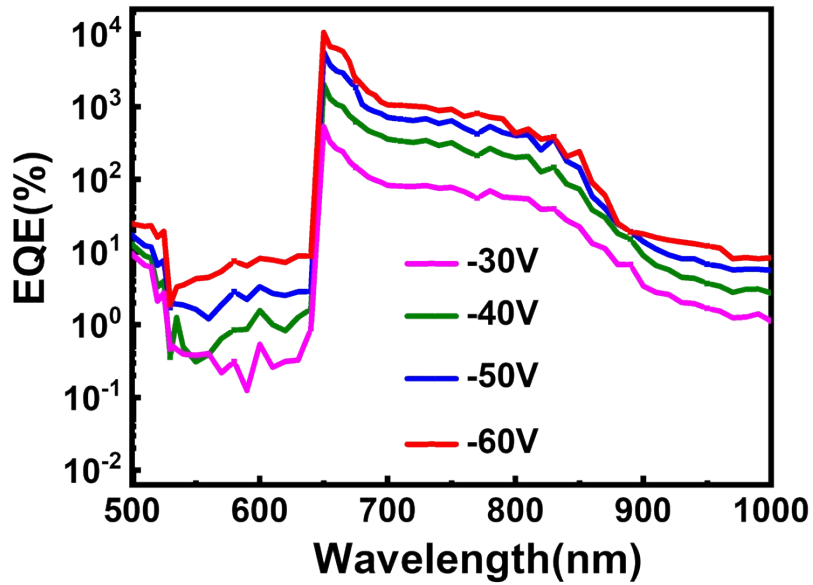

4

5 Figure S5 Semi-log EQE spectra of the P3HT:Y6 -based PM-OPD operated at different biases.

6

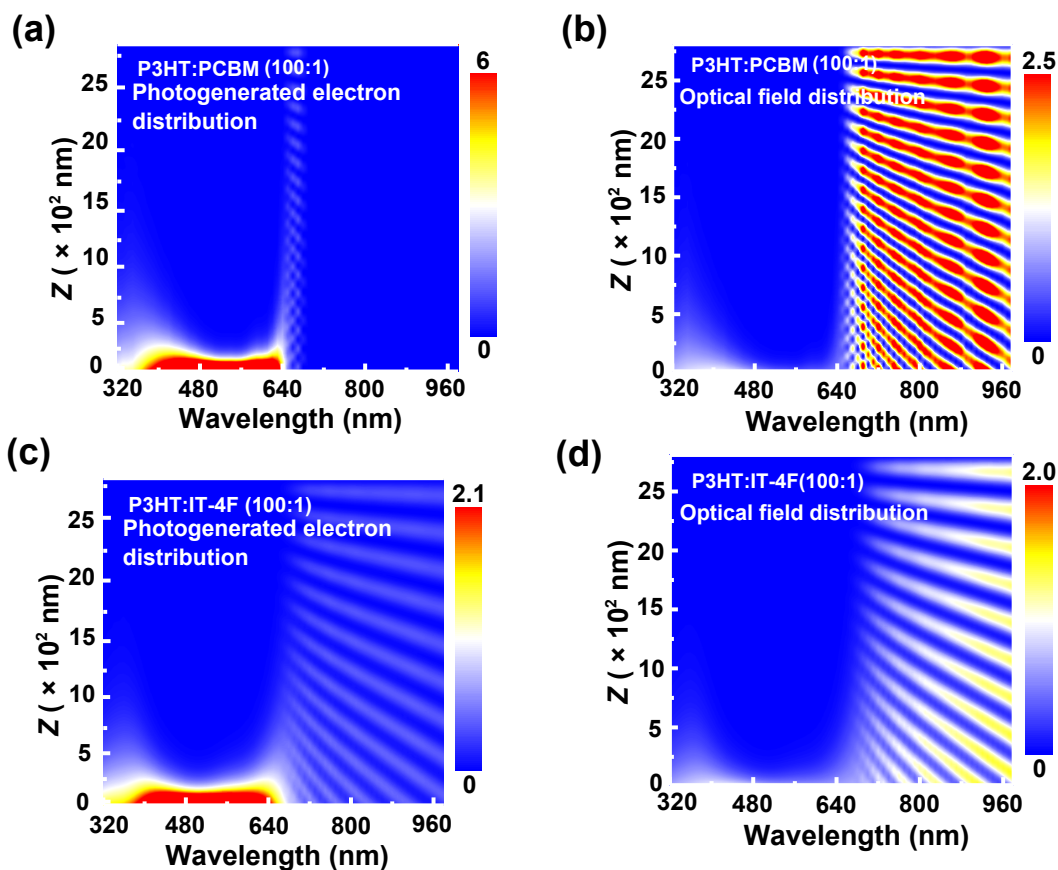

1

2 Figure S6 Optical field distribution calculated for PM-OPDs with 2.8 μm thick active layers of  
 3 (a) P3HT:PCBM (100:1) and (b) P3HT:IT-4F (100:1), and photogenerated electron profiles  
 4 calculated for PM-OPDs with a 2.8 μm thick active layers of (c) P3HT:PCBM (100:1) and (d)  
 5 P3HT:IT-4F (100:1).

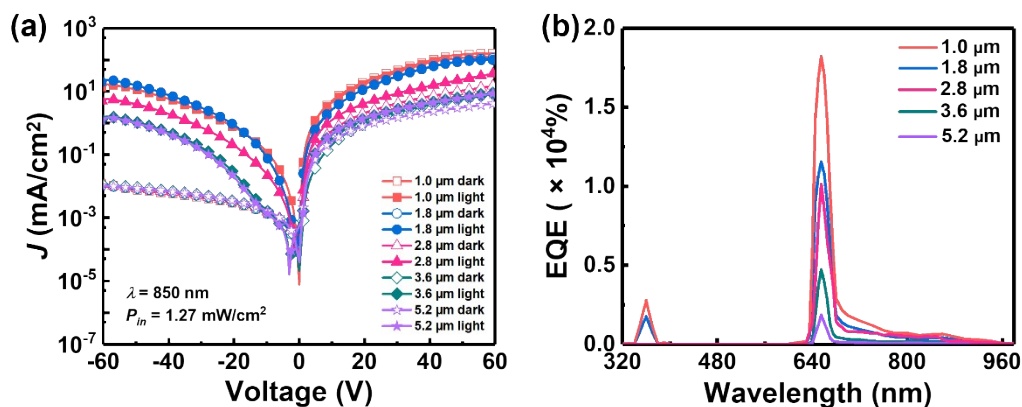

6

7 Figure S7 (a)  $J$ - $V$  characteristic, and (b) EQE spectra operated under the bias of -60 V for  
 8 P3HT:Y6 BHJ PM-OPD with different active layer thicknesses.

9

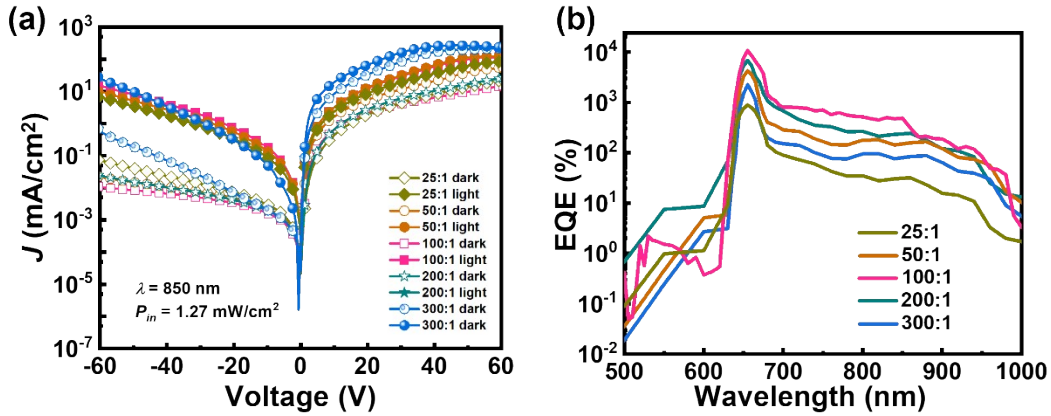

1  
 2 Figure S8 (a)  $J$ - $V$  characteristic (b) semi-log EQE spectra operated under the bias of  $-60$  V for  
 3 P3HT:Y6 BHJ PM-OPDs with different D:A ratio.

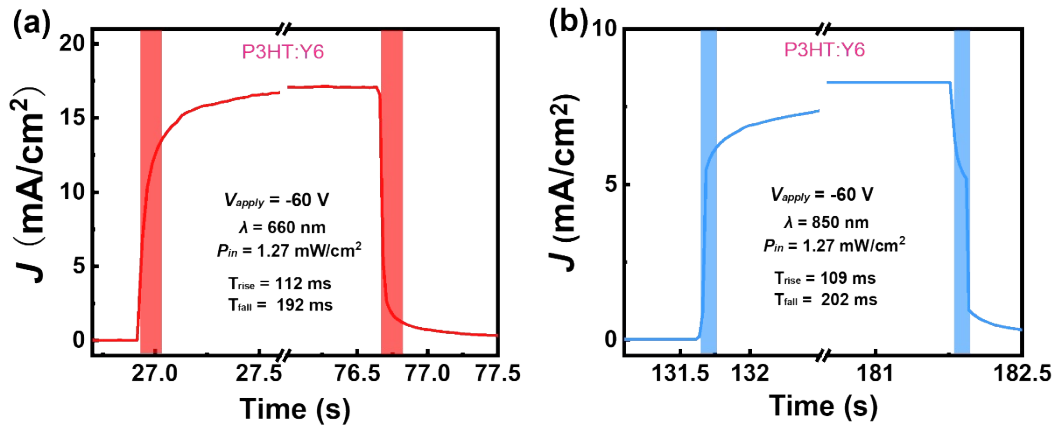

4  
 5 Figure S9 Response times for the P3HT:Y6 BHJ PM-OPD, operated at the bias of  $-60$  V, under  
 6 illumination of LEDs with emission peak wavelengths of (a) 660 nm and (b) 850 nm.

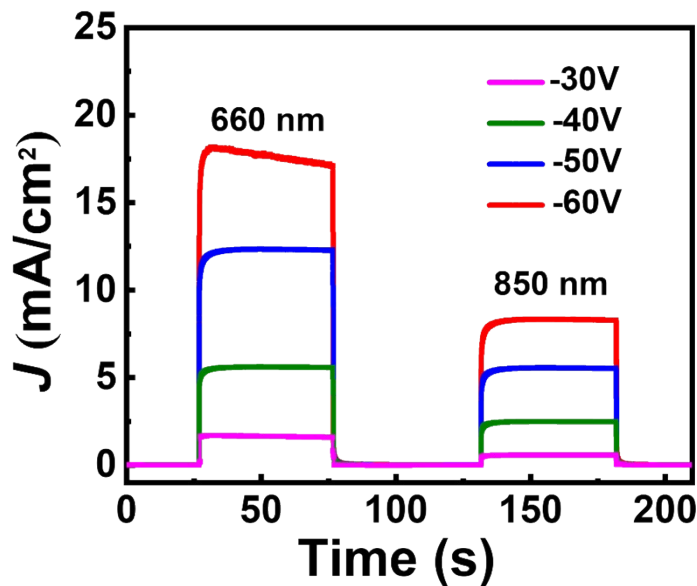

7

1 Figure S10 Transient responses measured for the P3HT:Y6 BHJ PM-OPD, operated at different  
2 bias, under illumination of LEDs with emission peak wavelengths of 660 nm and 850 nm.

3

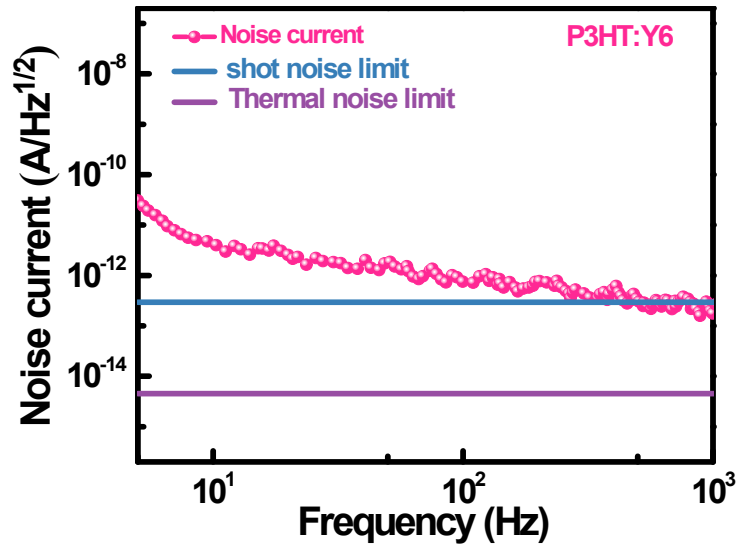

4

5 Figure S11 Noise spectral density measured for P3HT:Y6 (100:1)-based PM-OPD operated  
6 under bias of  $-60$  V.

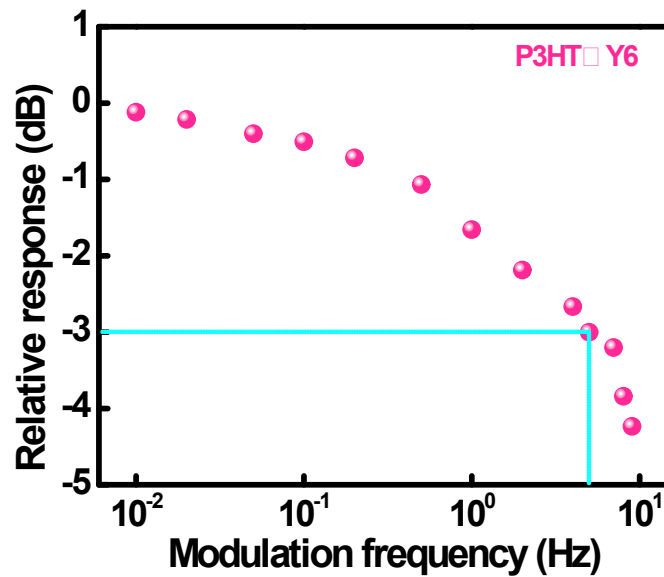

7

8

9 Figure S12 Frequency response of the P3HT:Y6 (100:1)-based PM-OPD operated under bias  
10 of  $-60$  V.

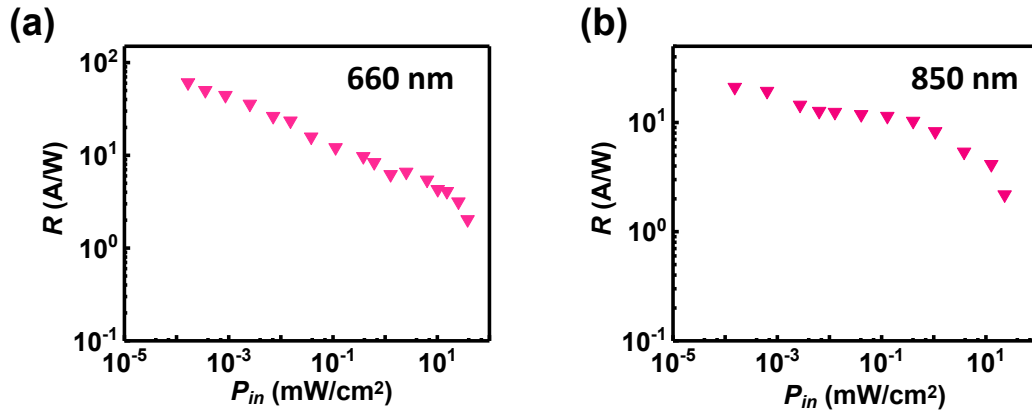

1

2 Figure S13  $R(\lambda)$ – $P_{in}$  characteristics measured for the P3HT:Y6 (100:1)-based PM-OPD under  
 3 illumination of (a) 660 nm and (b) 850 nm LEDs.

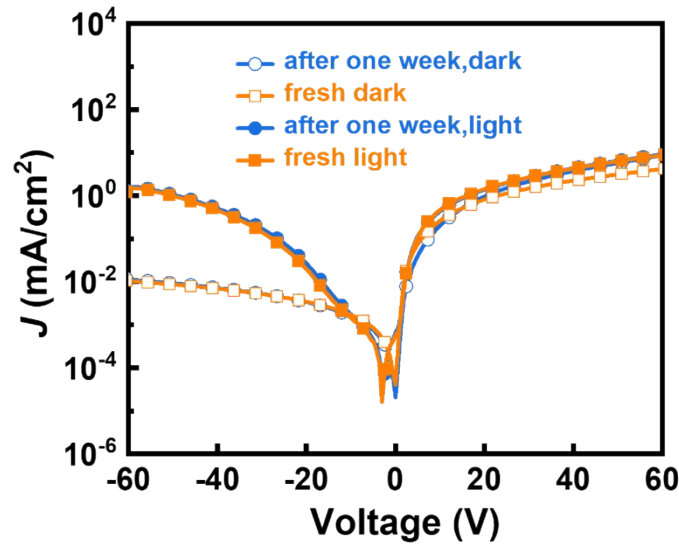

4

5 Figure S14  $J$ – $V$  characteristics in dark and under illumination (850 nm, 1.27 mW/cm<sup>2</sup>) of the  
 6 freshly prepared P3HT:Y6 BJJ PM-OPD device and its corresponding performances after the  
 7 device aged in air over one week.

8

9

## 10 References

- 11 [1] Shi, L., Chen, K., Zhai, A. et al. Status and outlook of metal–inorganic semiconductor–  
 12 metal photodetectors. *Laser Photonics Rev.* 2020; 15: 2000401.  
 13 [2] Shi, L., Zhu, Y., Li, G. et al. Atomic-level chemical reaction promoting external quantum  
 14 efficiency of organic photomultiplication photodetector exceeding 10<sup>8</sup>% for weak-light  
 15 detection. *Sci. Bull.* 2023; 68: 928-37.  
 16 [3] Fang, Y., Armin, A., Meredith, P. & Huang, J. Accurate characterization of next-generation  
 17 thin-film photodetectors. *Nat. Photon.* 2018; 13: 1-4.  
 18 [4] Wang, Y., Kublitski, J., Xing, S. et al. Narrowband organic photodetectors–towards



- 1 miniaturized, spectroscopic sensing. *Mater. Horiz.* 2022; 9: 220-51.
- 2 [5] Pierre, A., Gaikwad, A. & Arias, A. C. Charge-integrating organic heterojunction
- 3 phototransistors for wide-dynamic-range image sensors. *Nat. Photon.* 2017; 11: 193-9.
- 4
